# Supplementary material for: Abrupt climate changes and the astronomical theory
Source: Copernicus journal article supplement (doi:10.5194/cp-2021-103), 2021-08-11

# Detection of Abrupt transitions from benthic $\delta^{18}O$ in U1308 with the K-S method

2 - 30: Glacial stages  
 1 - 29: Interglacial stages

— Cooling transition  
 — Warming transition

19/20 MIS boundary

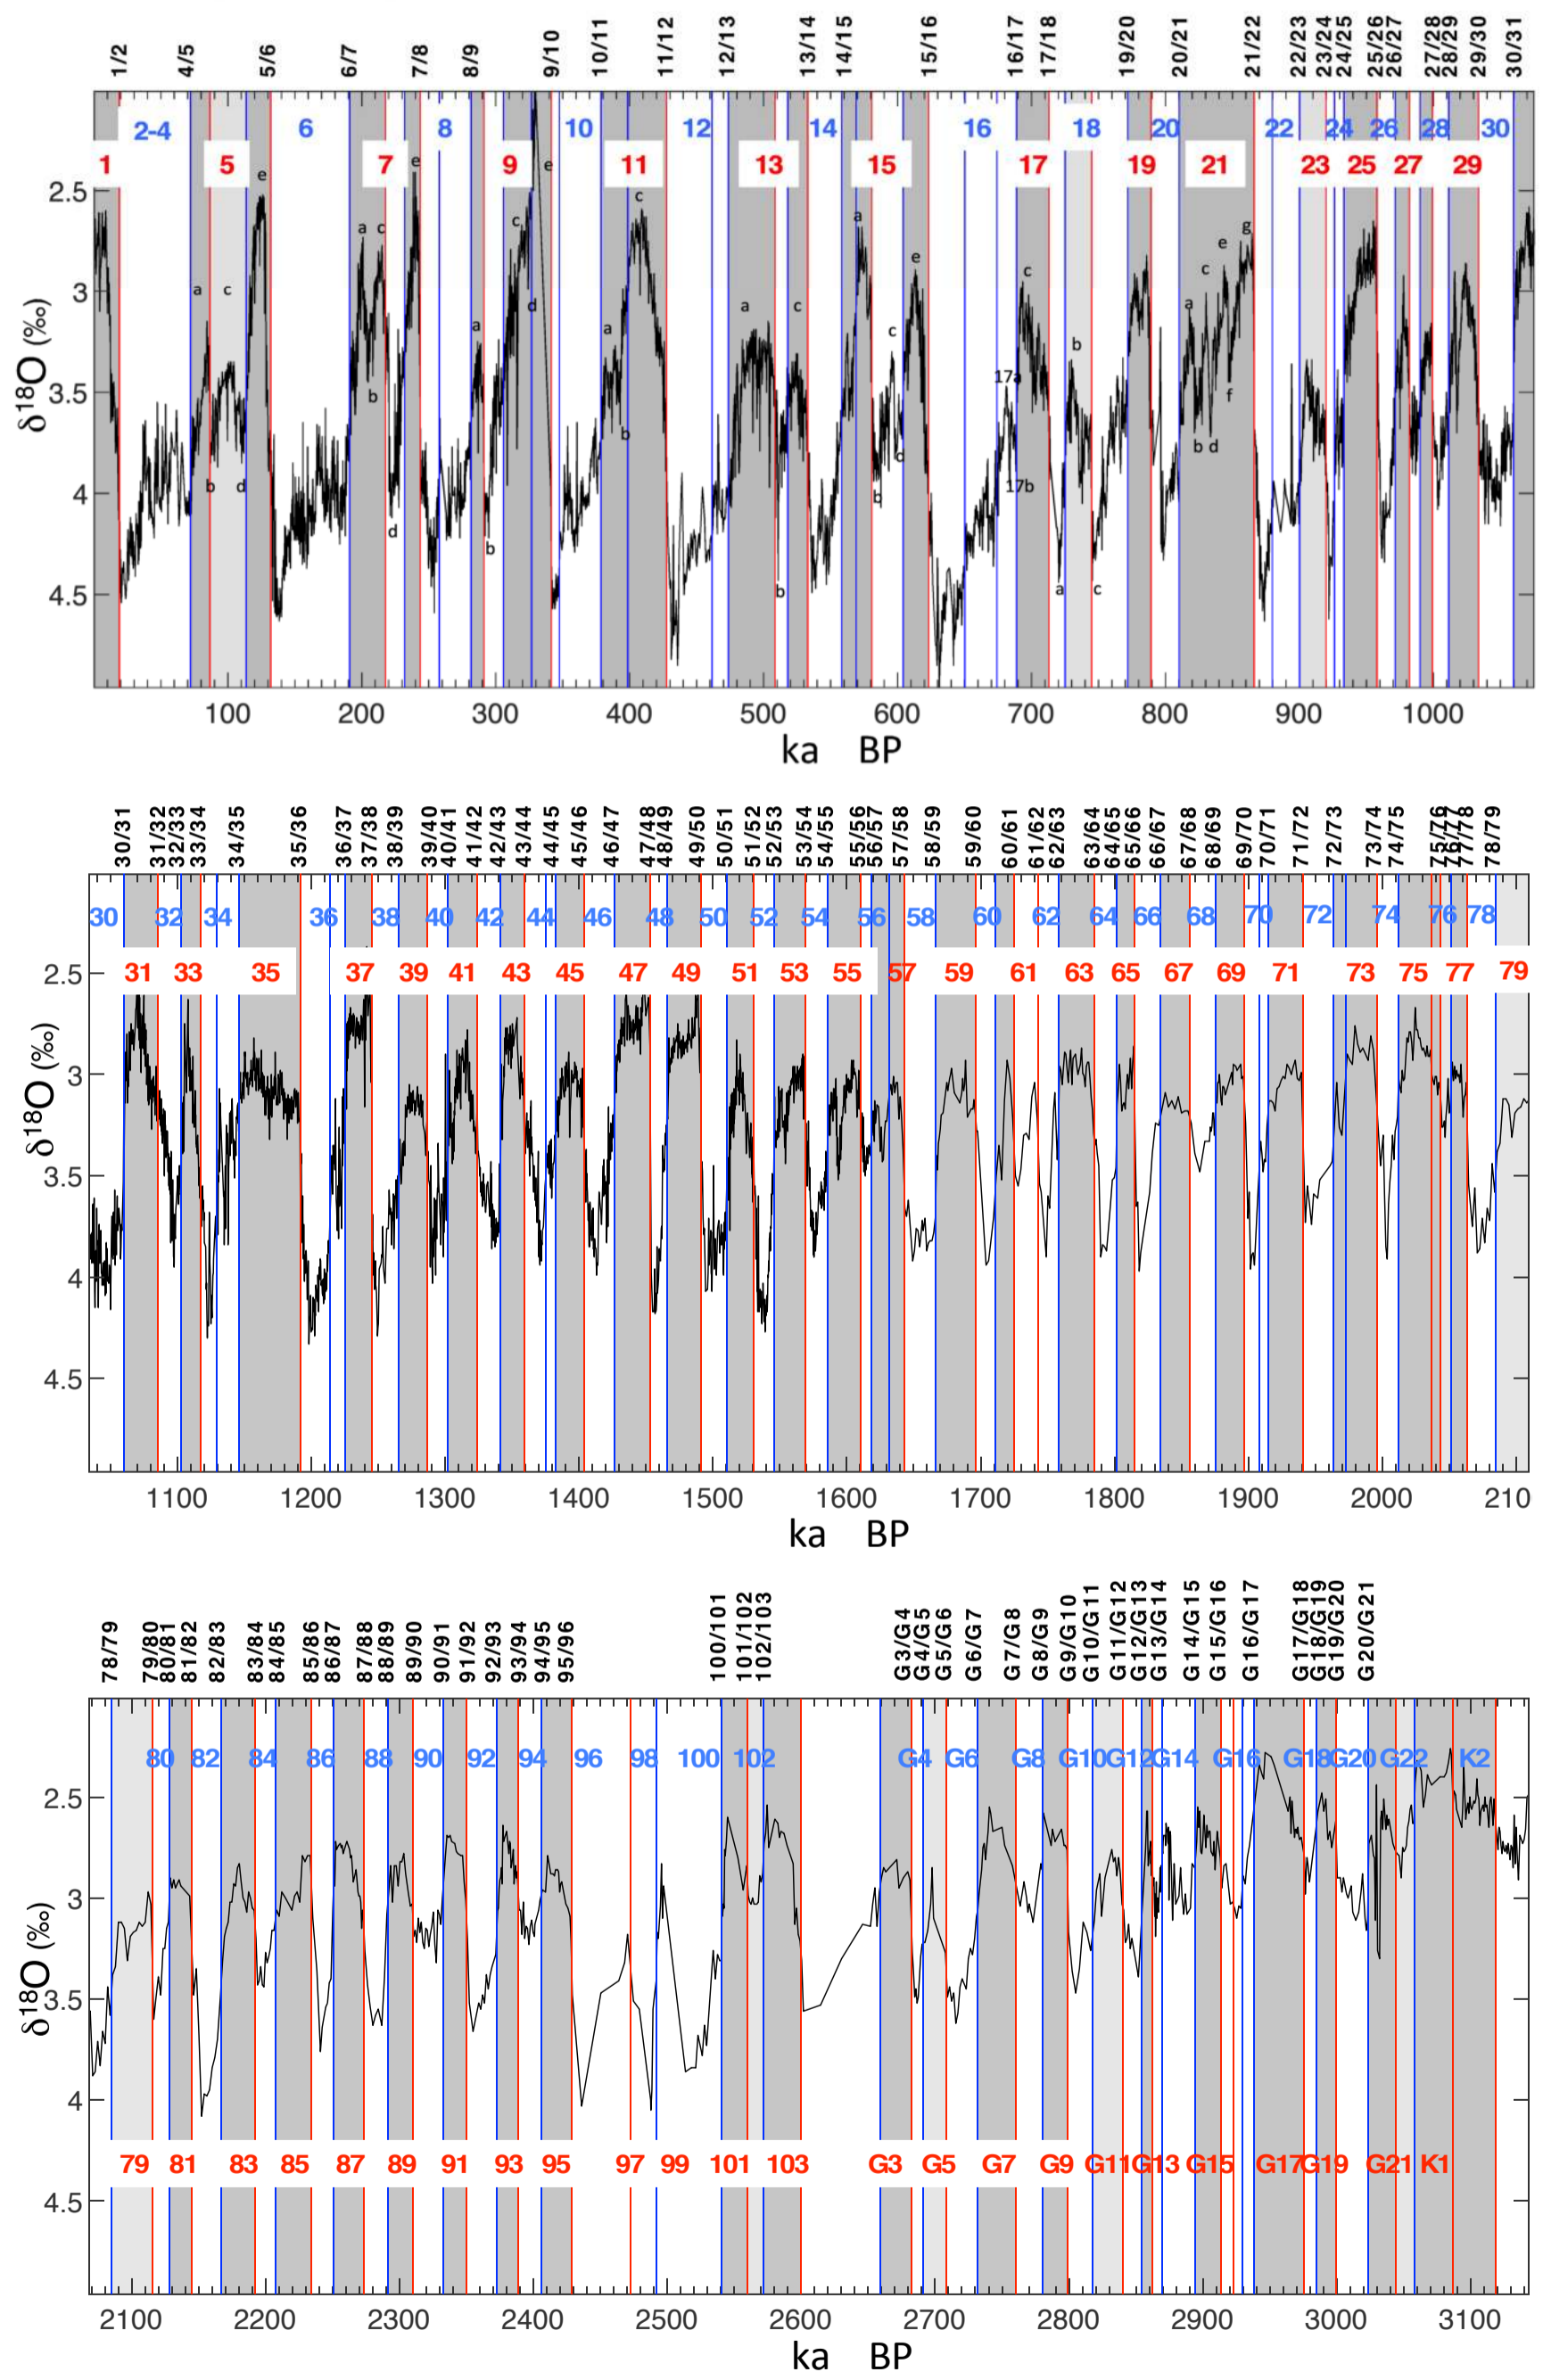

MIS boundaries from Lisiecki & Raymo (2005). *Paleoceanography*, PA1003, doi:10.1029/2004PA001071 and odd MIS from Hodell and Channel (2016) *Climate of the Past*, 12, https://doi.org/10.5194/cp-12-1805-2016.

Substage numbering from Railsback et al. (2015). *Quaternary Science Reviews* 111. https://doi.org/10.1016/j.quascirev.2015.01.012.

# Detection of Abrupt transitions in NGRIP d180 with the K-S method

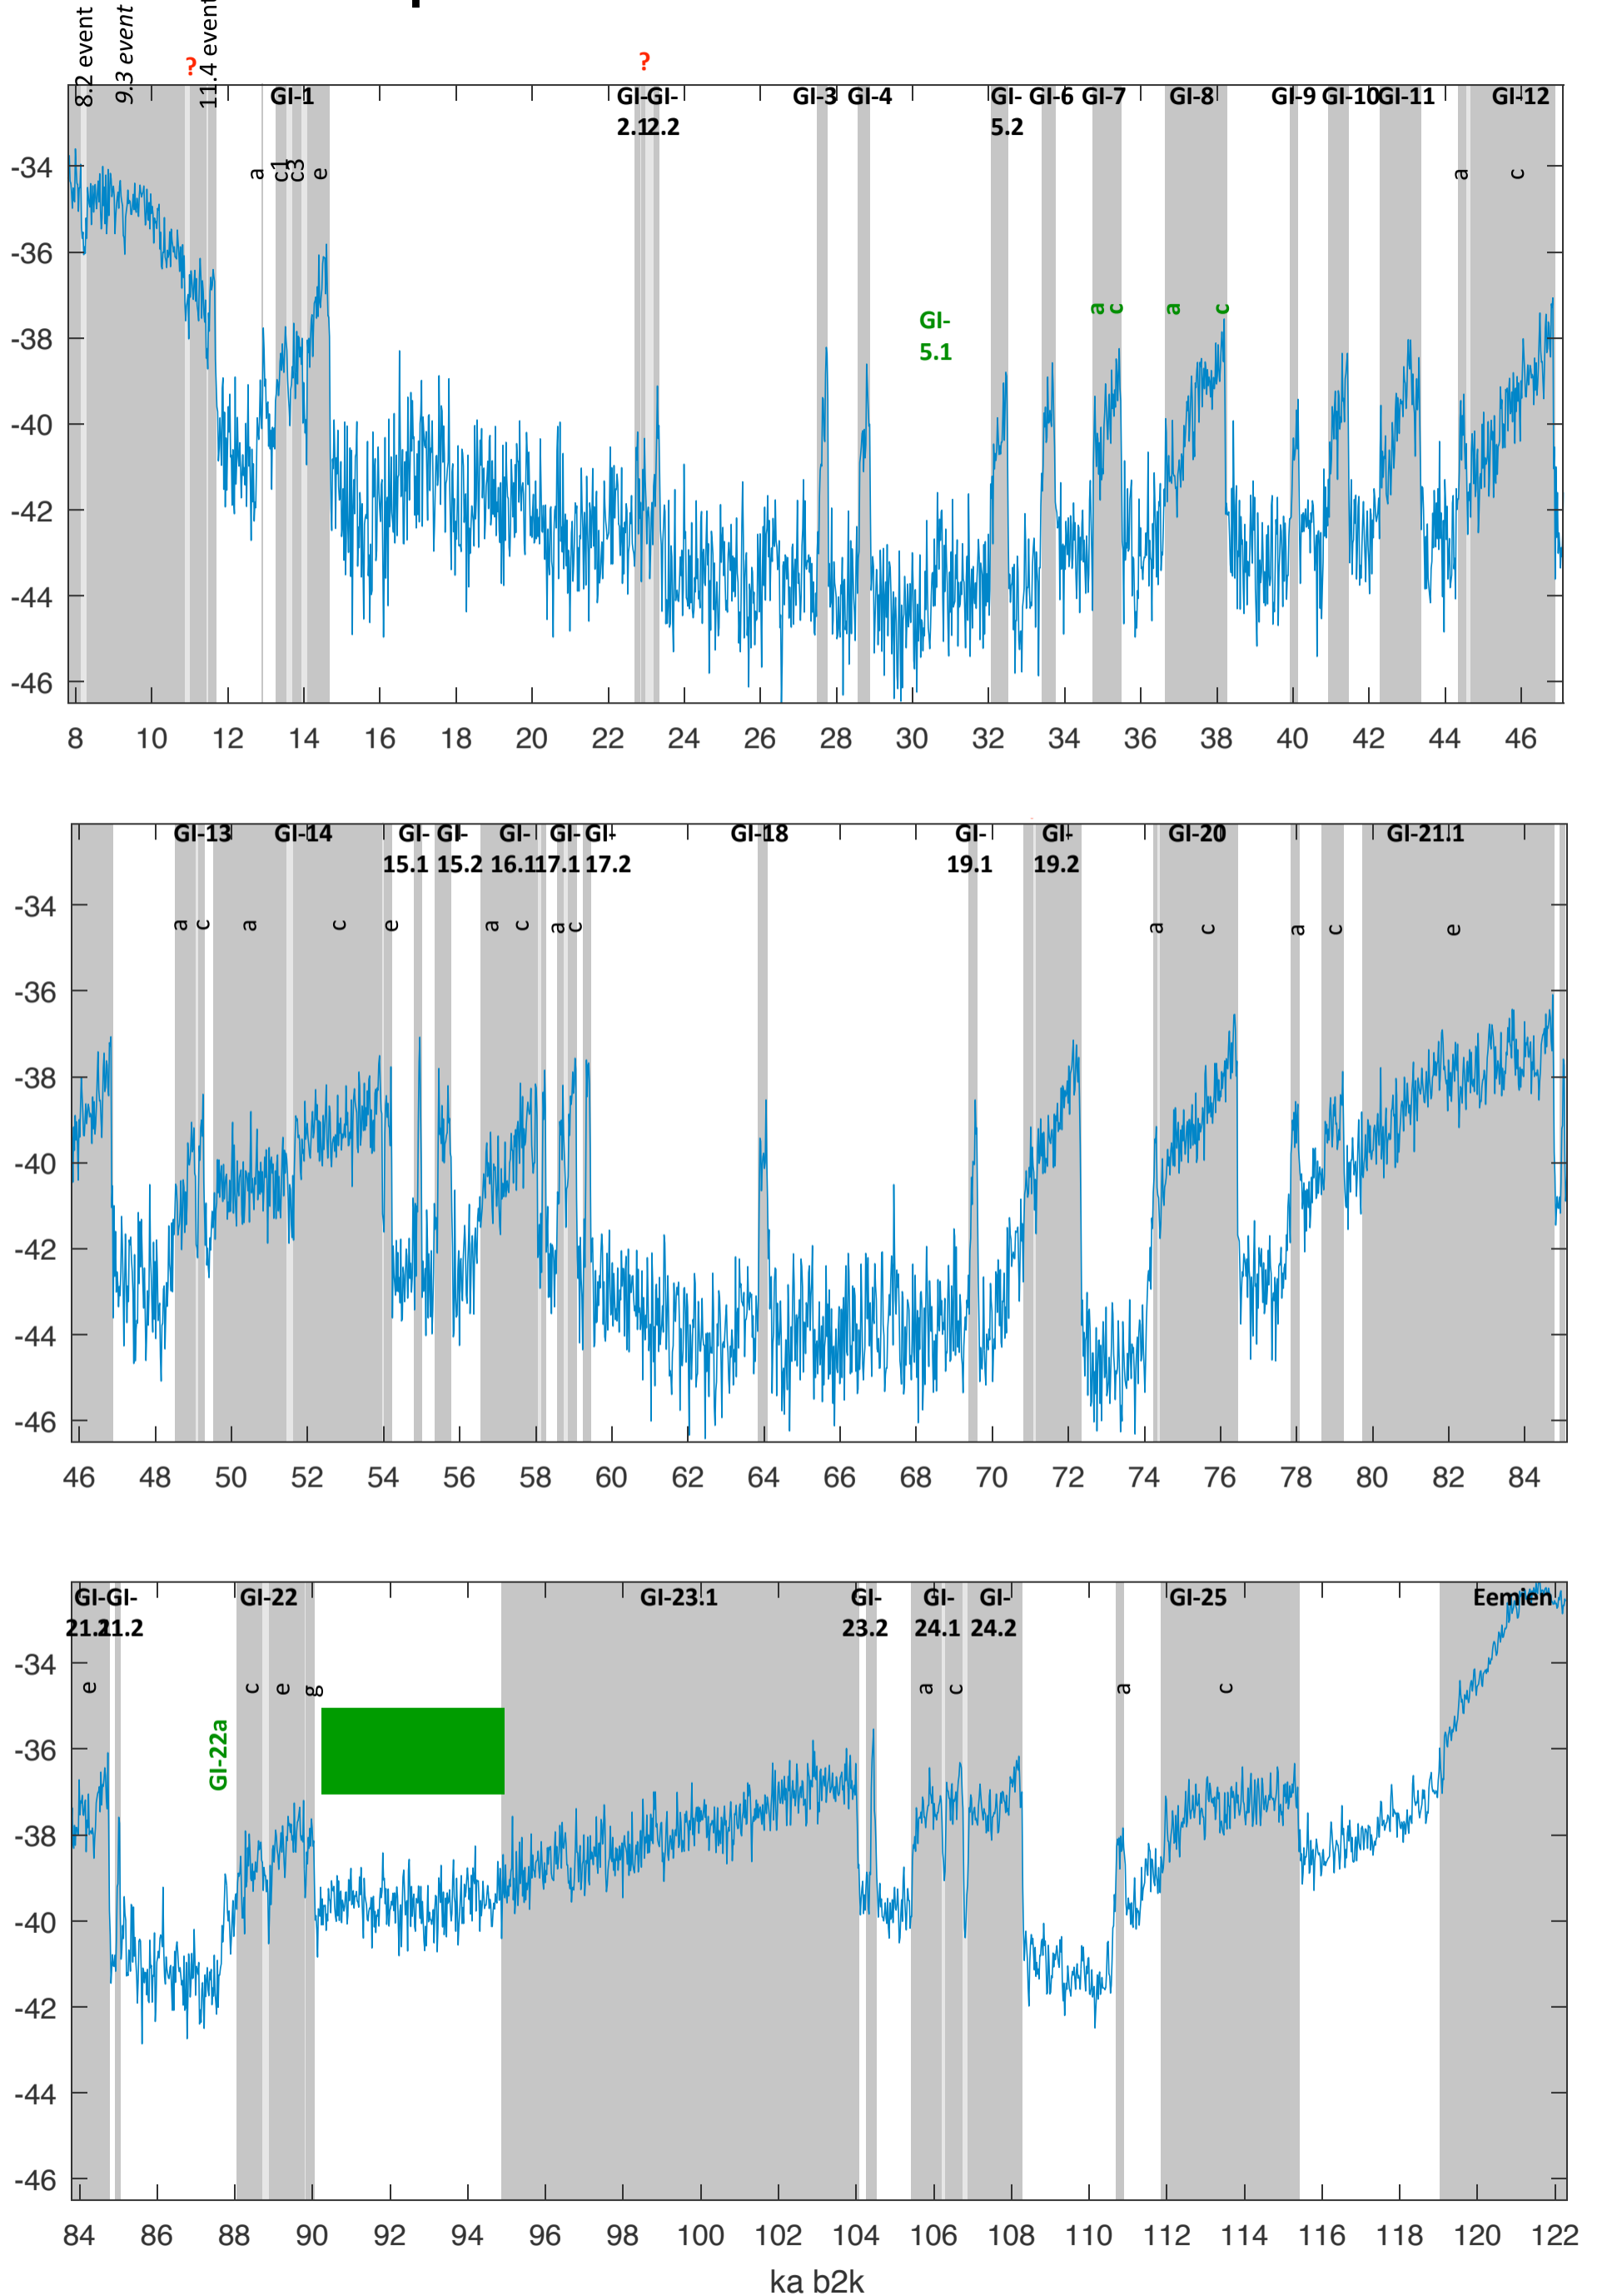

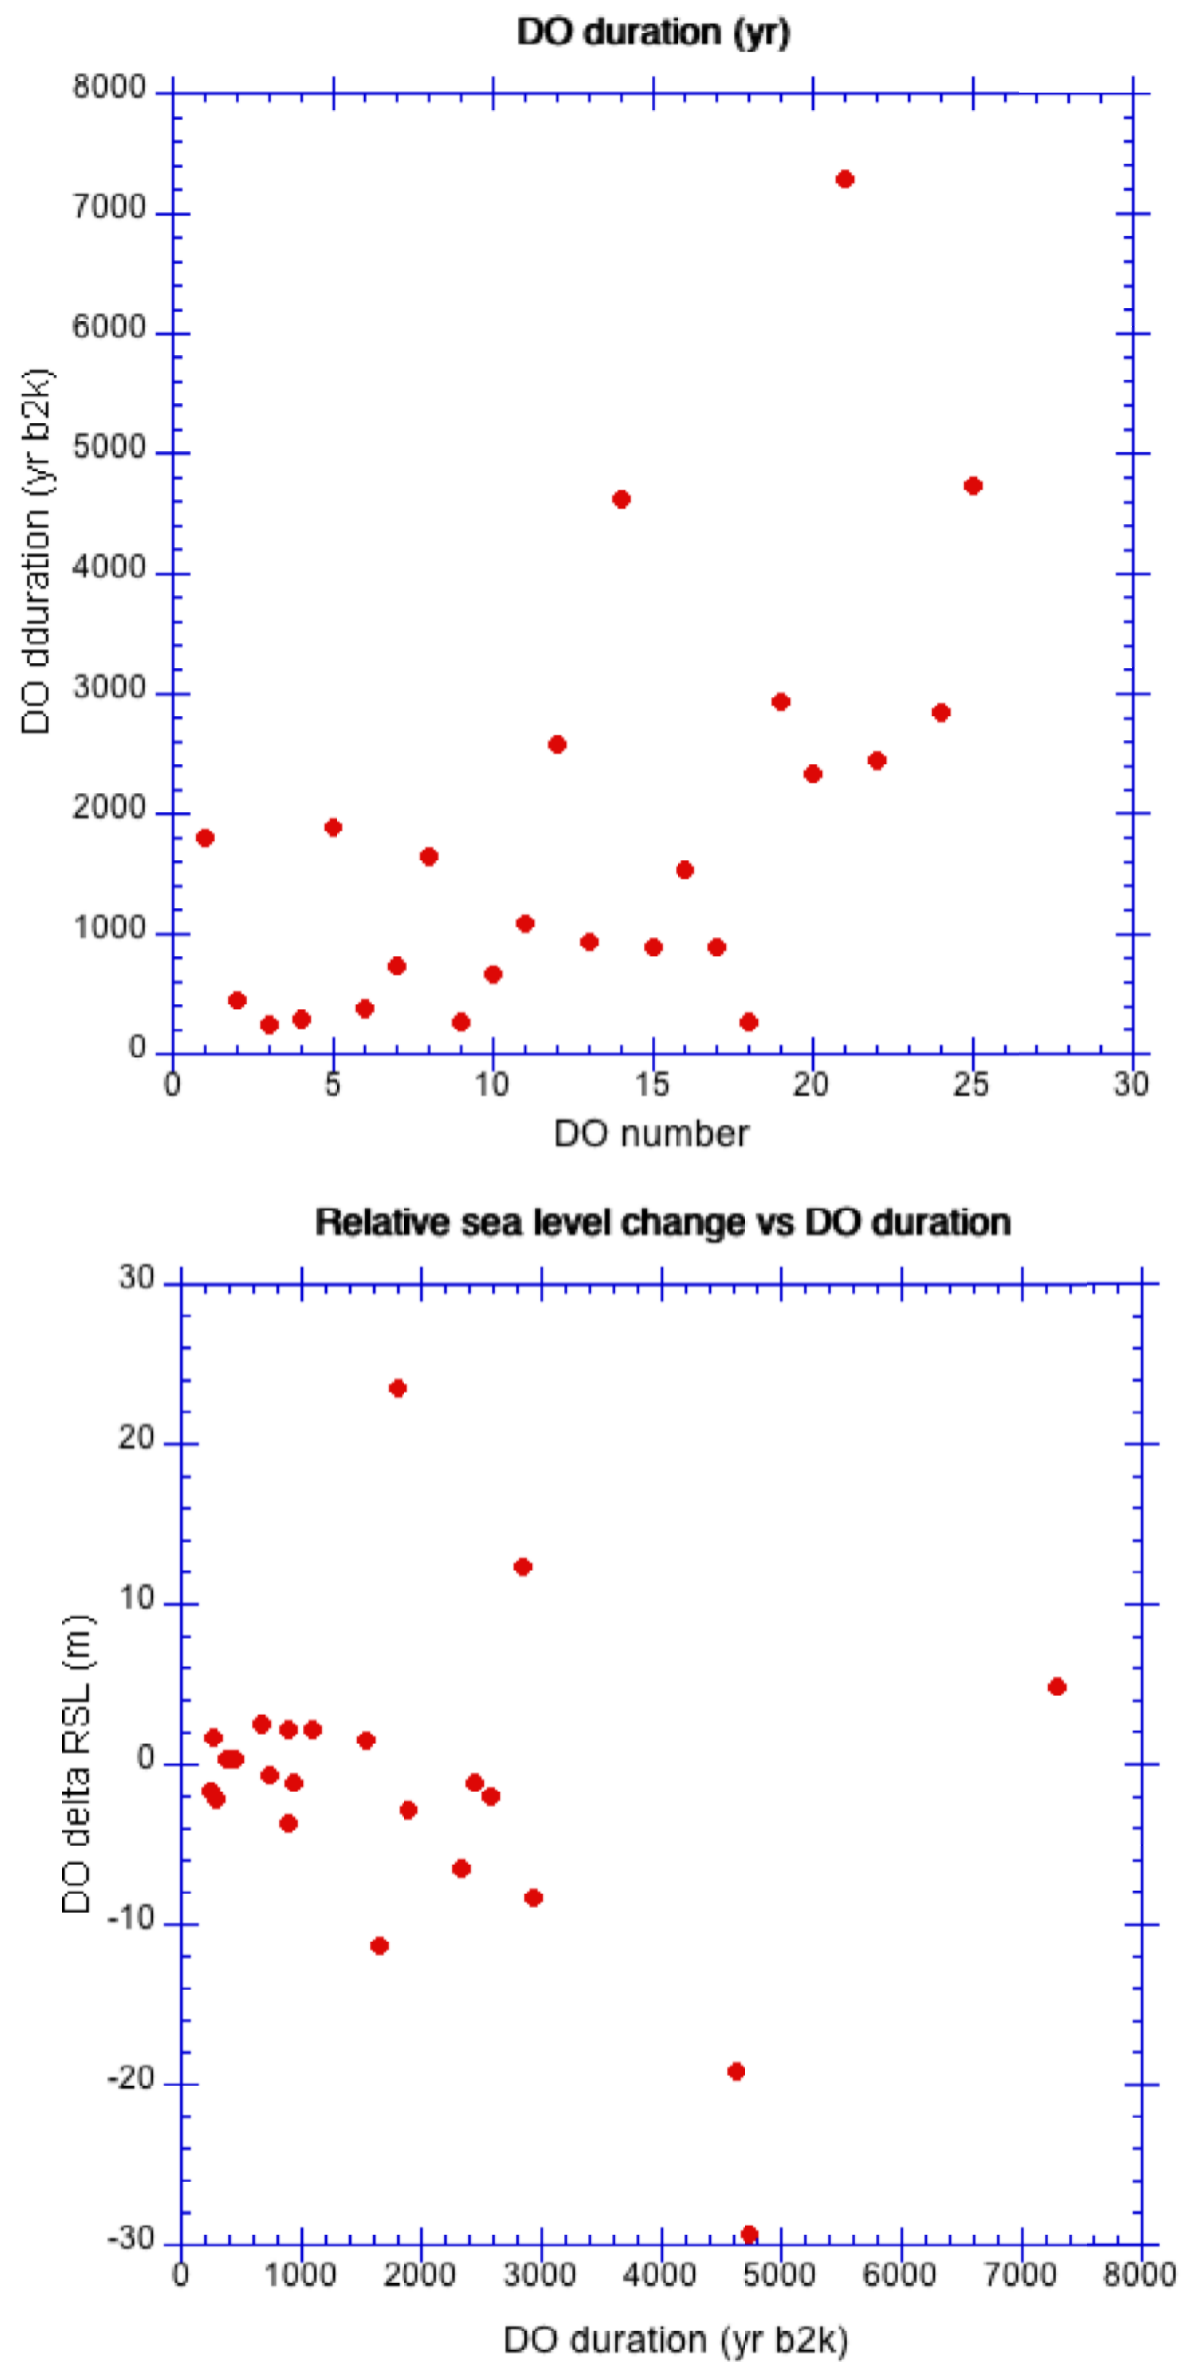

Supplement: Supplementary file 1 [file cp-2021-103-supplement-version2.pdf]
